# Supplementary material
Source: Springer Nature journal article supplement (https://www.springermedizin.de/resource/supplementary/13054_2010_9530_MOESM2_ESM.pdf/9706364)

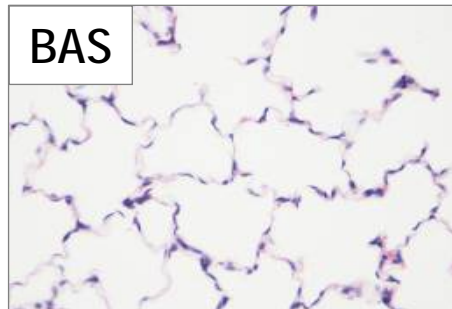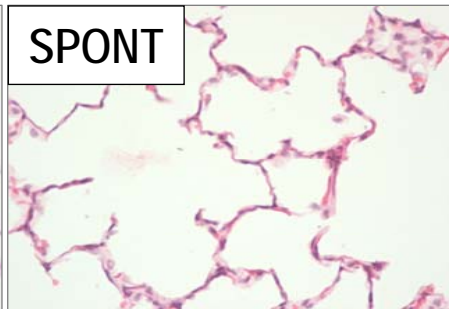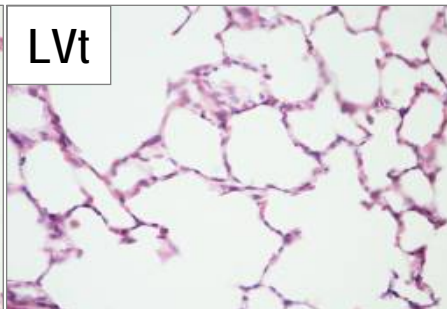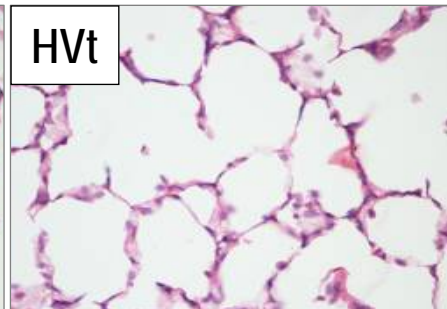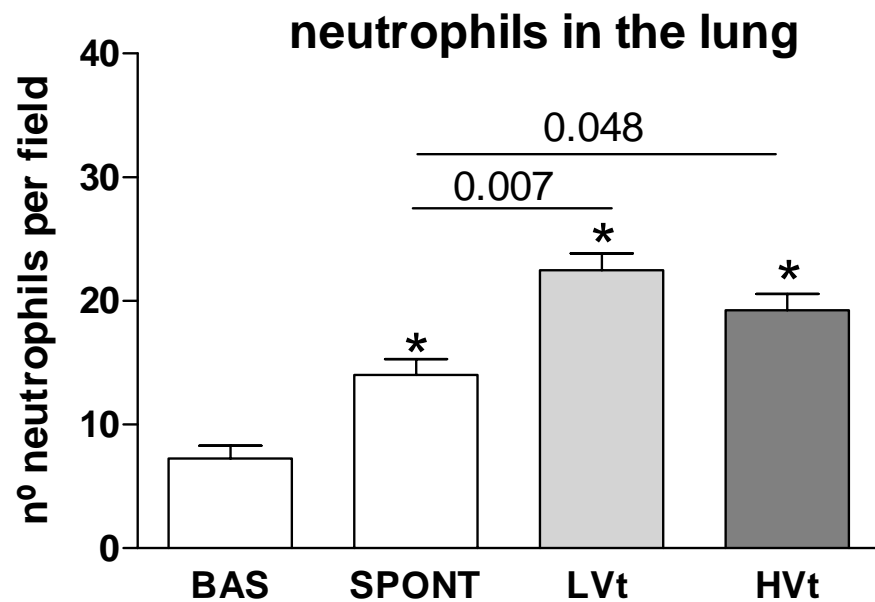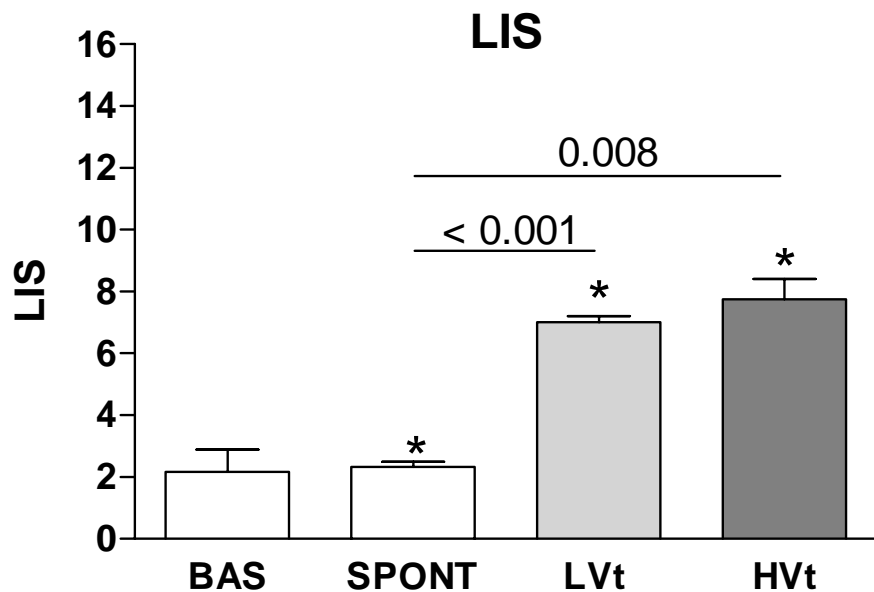

Supplement: MOESM2 [file 9706364]
